# Supplementary material
Source: Royal Society of Chemistry journal article supplement (doi:10.1039/d6ta01720g)
Supplement: d6ta01720g1.pdf [file d6ta01720g1.pdf]

## Supplementary Information

### **Gas-Phase Growth of Two-Dimensional Nonlayered Metallic Cu<sub>2</sub>Se Nanoflakes for Ultrasensitive Surface-Enhanced Raman Scattering**

Guiying Li,<sup>†a</sup> Yuying Wang,<sup>†a</sup> Ning Zhou,<sup>a</sup> Chenying Yang,<sup>a</sup> Yuchuan Shao,<sup>ab</sup> and Tao Liang<sup>\*a</sup>

<sup>a</sup> Hangzhou Institute for Advanced Study, University of Chinese Academy of Sciences, Hangzhou 310024, China. E-mail: liangtao@ucas.ac.cn

<sup>b</sup> Key Laboratory of Materials for High-Power Laser, Shanghai Institute of Optics and Fine Mechanics, Chinese Academy of Sciences, Shanghai 201800, China.

<sup>†</sup> These authors contributed equally to this work.

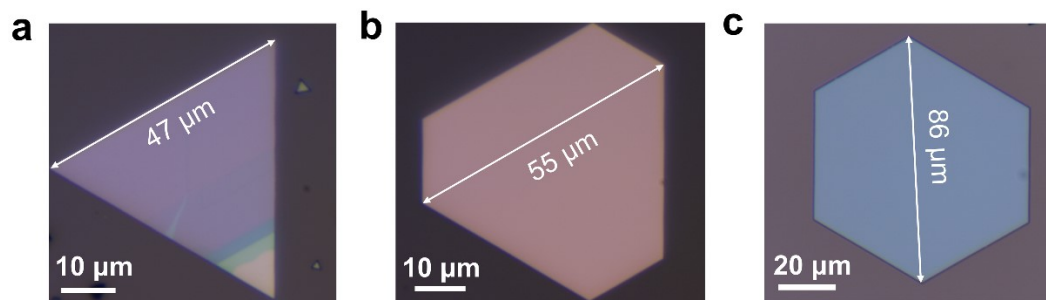

**Figure S1.** OM images of 2D Cu<sub>2</sub>Se nanoflakes with (a) triangular, (b) truncated triangular, and (c) hexagonal morphologies, showing the corresponding lateral sizes.

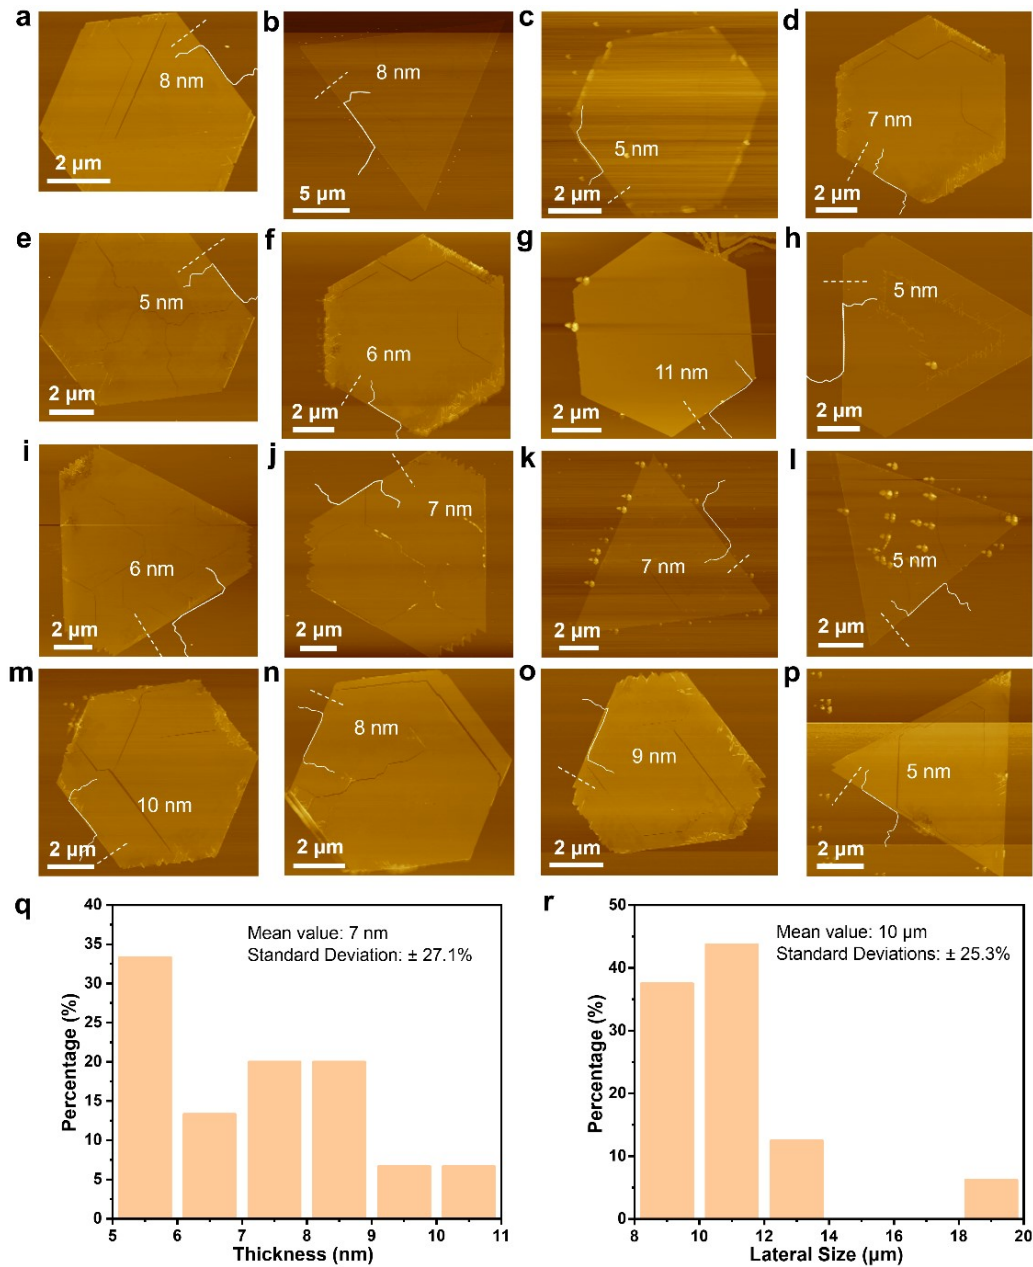

**Figure S2.** Statistical evaluation of both the lateral size and thickness distributions of the Cu<sub>2</sub>Se nanoflakes. (a-p) AFM height images of multiple Cu<sub>2</sub>Se nanoflakes synthesized under the optimal growth conditions. (q) Histogram of the thickness distribution. (r) Histogram of the lateral size distribution.

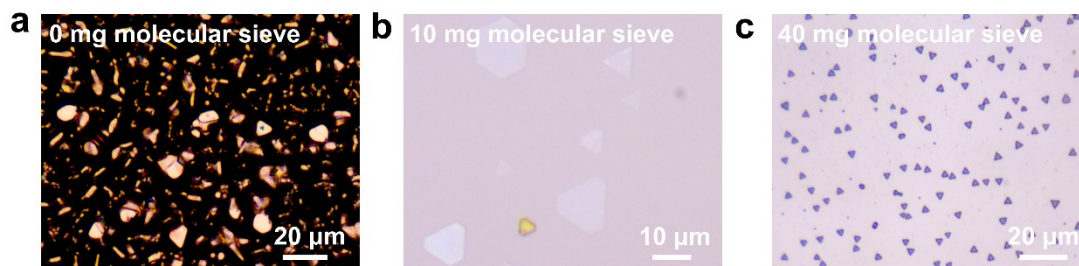

**Figure S3.** OM images of  $\text{Cu}_2\text{Se}$  nanoflakes synthesized with varied masses of molecular sieve: (a) 0, (b) 10, and (c) 40 mg, respectively.

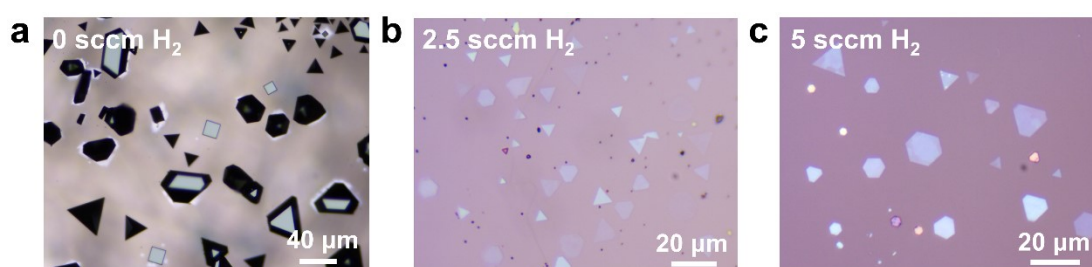

**Figure S4.**  $\text{Cu}_2\text{Se}$  nanoflakes synthesized with different  $\text{H}_2$  concentrations in the carrier gas ( $\text{Ar}/\text{H}_2$  mixture). (a-c) The  $\text{H}_2$  partial flow rates are 0, 2.5, and 5 sccm as labeled, respectively.

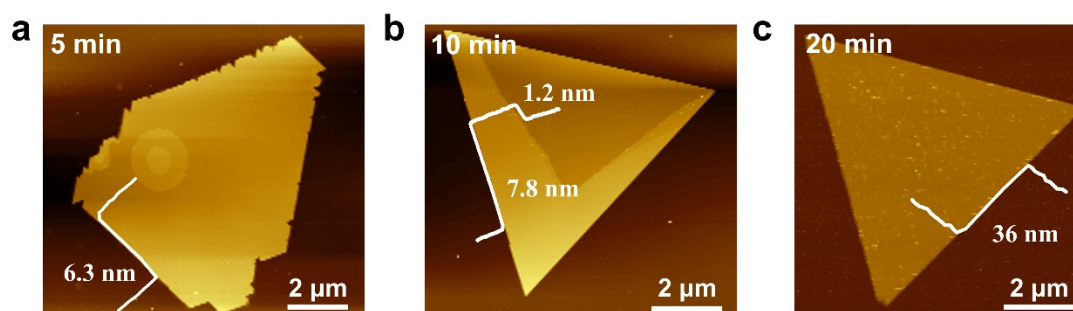

**Figure S5.** AFM images of  $\text{Cu}_2\text{Se}$  nanoflakes grown for (a) 5 min, (b) 10 min, and (c) 20 min, respectively.

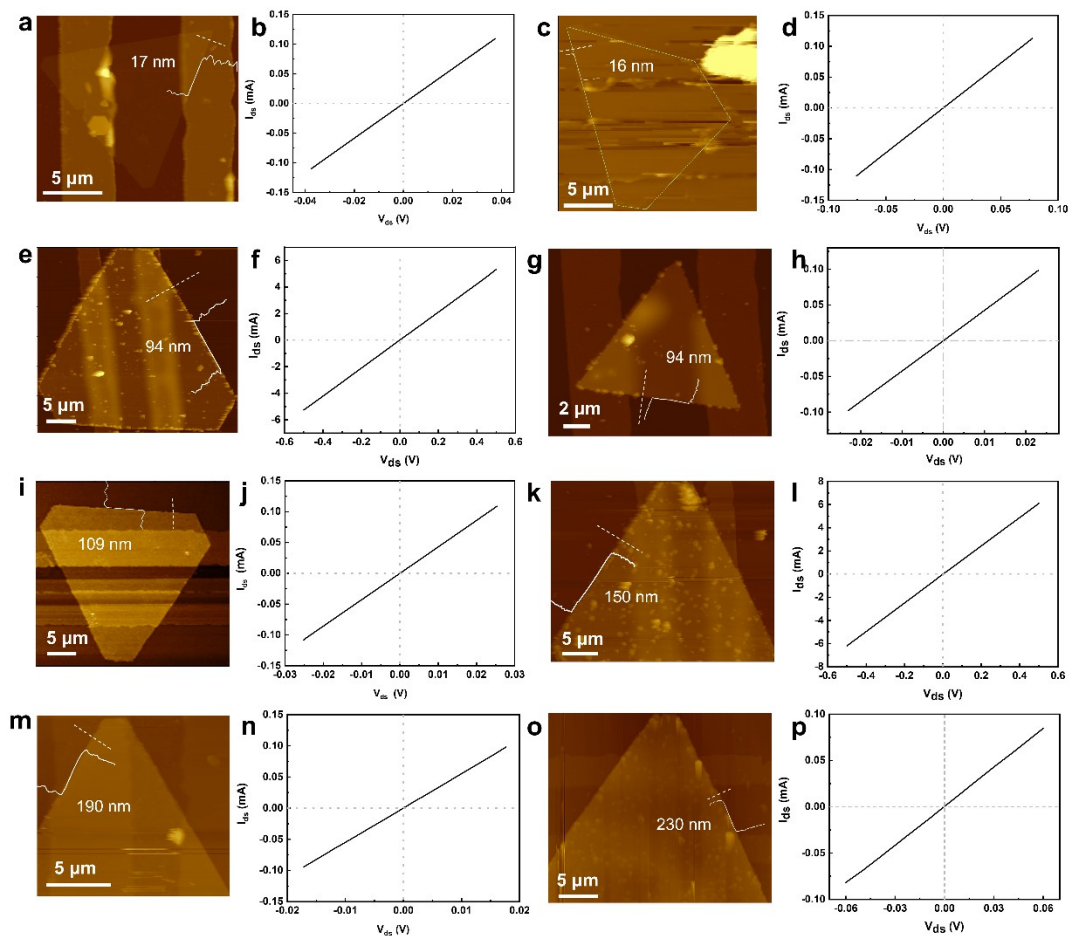

**Figure S6.** AFM height images and corresponding output characteristics of  $\text{Cu}_2\text{Se}$  FET devices with different thicknesses.

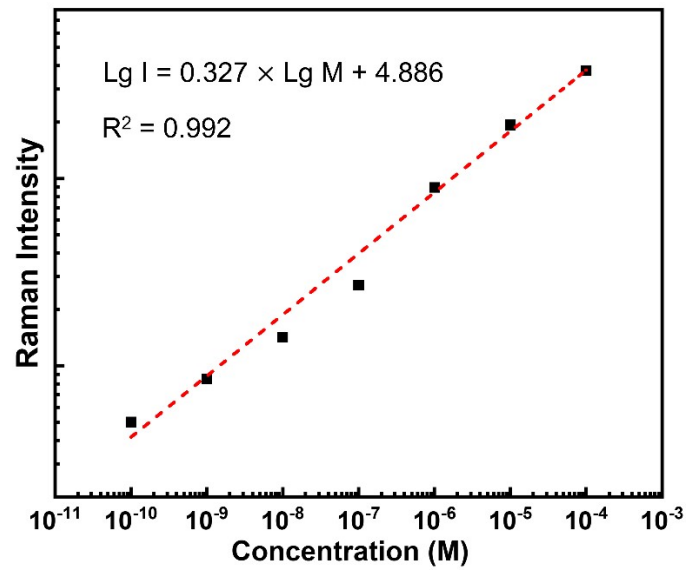

Figure S7. Raman intensity as a function of MB concentration.

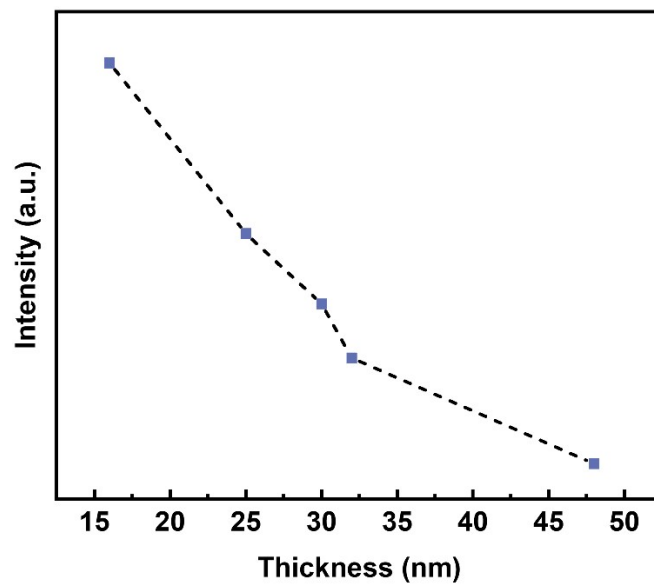

Figure S8. Thickness-dependent SERS Raman intensity of  $\text{Cu}_2\text{Se}$  nanoflakes.

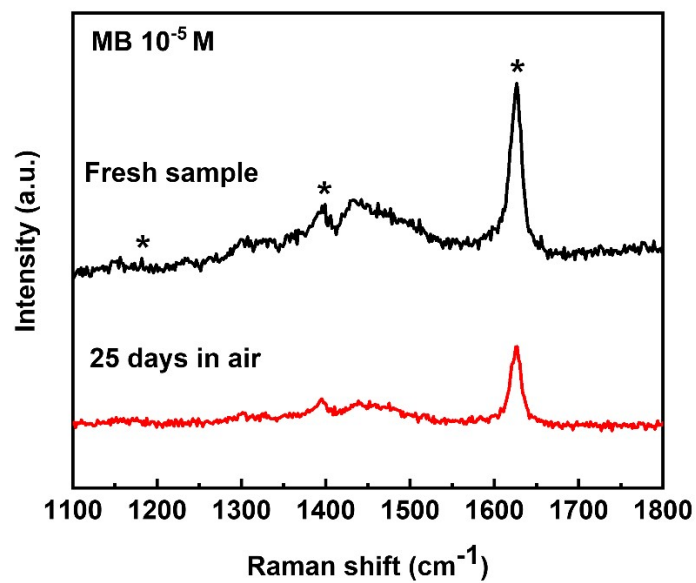

**Figure S9.** Comparison of Raman spectra of MB ( $10^{-5}$  M) on  $\text{Cu}_2\text{Se}$  nanoflake after exposure to ambient air for 25 days.

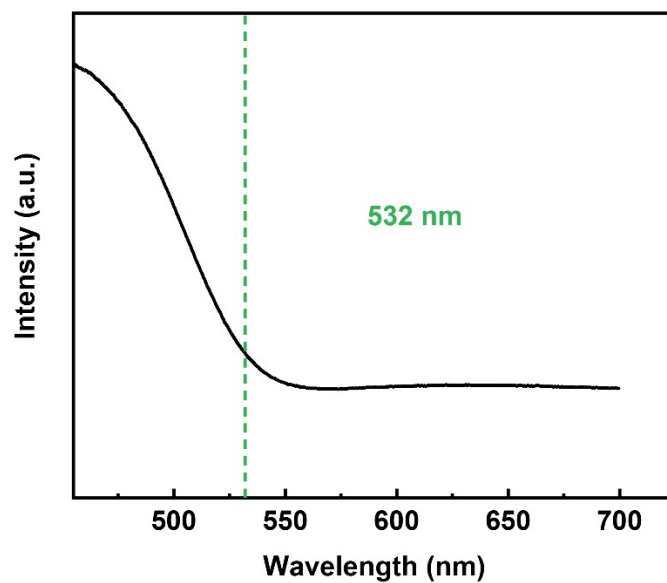

**Figure S10.** UV-Vis absorption spectrum of  $\text{Cu}_2\text{Se}$  nanoflakes.

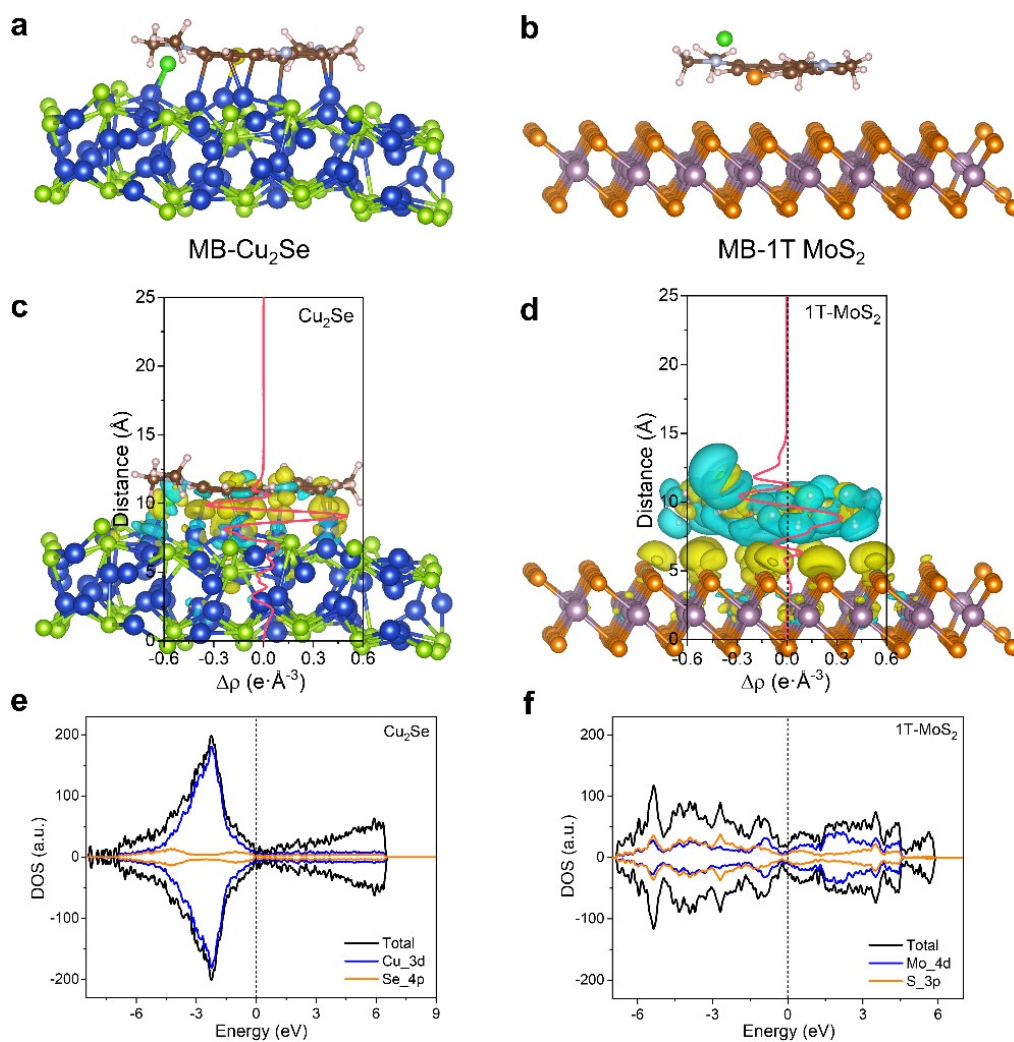

**Figure S11.** DFT calculations of interfacial electronic coupling in the MB/Cu<sub>2</sub>Se and MB/1T-MoS<sub>2</sub> systems. (a, b) Optimized adsorption configurations of MB on Cu<sub>2</sub>Se and 1T-MoS<sub>2</sub>, respectively. (c, d) Charge density difference plots and the corresponding plane-averaged charge density difference profiles for the MB/Cu<sub>2</sub>Se and MB/1T-MoS<sub>2</sub> interfaces, respectively. Yellow and cyan isosurfaces represent electron accumulation and depletion, respectively. (e, f) Projected DOS of the MB/Cu<sub>2</sub>Se and MB/1T-MoS<sub>2</sub> systems, respectively.

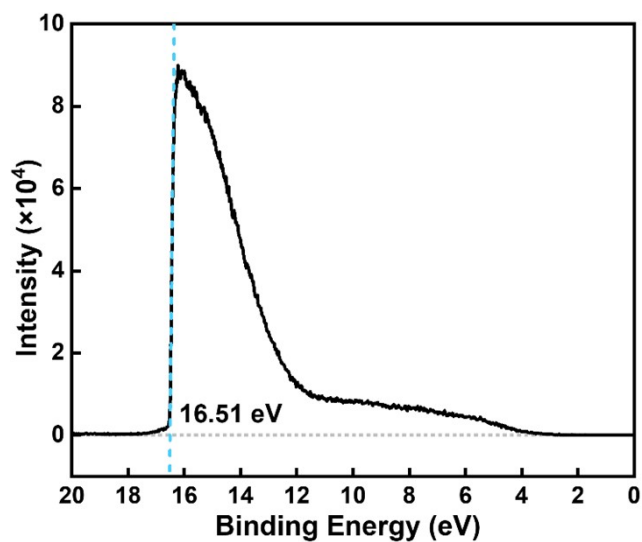

**Figure S12.** Secondary electron cutoff region in the UPS spectrum of  $\text{Cu}_2\text{Se}$  nanoflakes.

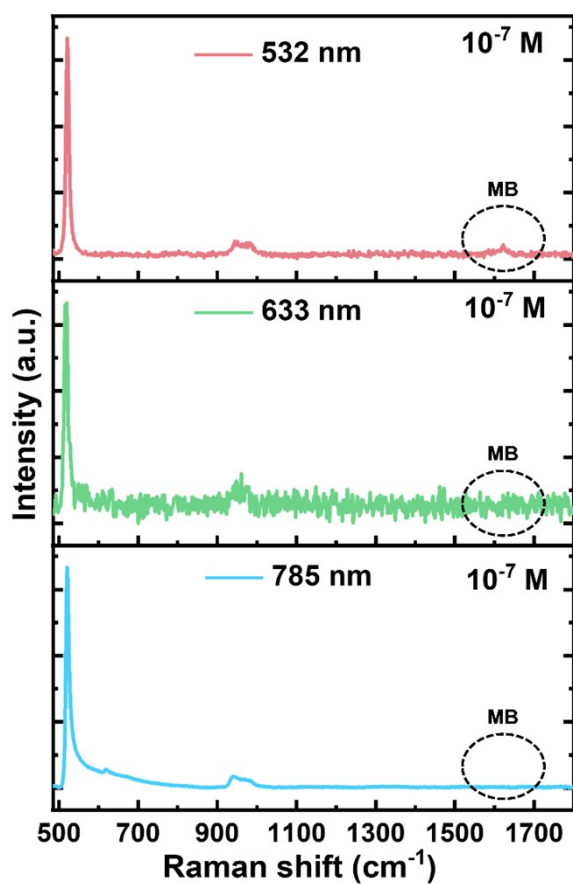

**Figure S13.** Raman spectra of MB ( $10^{-7}$  M) on  $\text{Cu}_2\text{Se}$  nanoflake under excitation at 532, 633, and 785 nm.

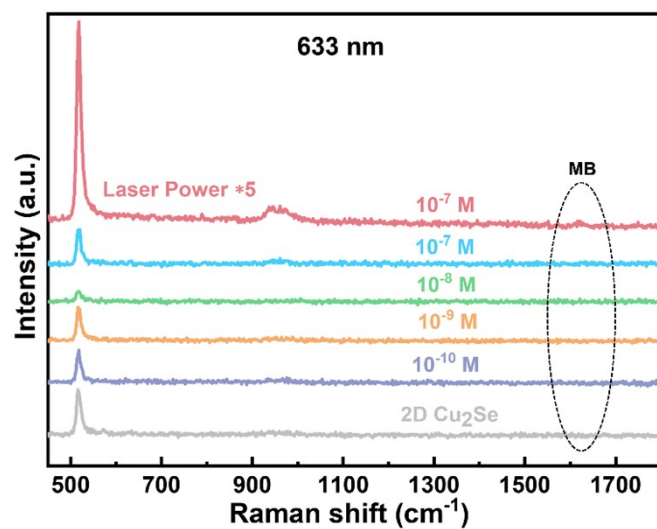

**Figure S14.** Raman spectra of MB with different concentrations ranging from  $10^{-7}$  to  $10^{-10}$  M on Cu<sub>2</sub>Se nanoflake excited under 633 nm laser excitation. For the top curve, the laser power is increased by 5-fold relative to that used for other spectra.

**Table S1.** Comparison of SERS performances based on various reported 2D metallic materials with this work.

| 2D Metallic Substrate                 | Analyte      | LOD [M]                  | EF                     | Ref.      |
|---------------------------------------|--------------|--------------------------|------------------------|-----------|
| Ta <sub>4</sub> C <sub>3</sub> MXenes | R6G          | 10 <sup>-7</sup>         | 1.51 × 10 <sup>5</sup> | 33        |
|                                       | CV           | 10 <sup>-6</sup>         | N/A                    |           |
| Nb <sub>4</sub> C <sub>3</sub> MXenes | R6G          | 5 × 10 <sup>-7</sup>     | 0.52 × 10 <sup>5</sup> | 33        |
| Ti <sub>3</sub> C <sub>2</sub> MXenes | MB           | 10 <sup>-7</sup>         | 2.9 × 10 <sup>6</sup>  | 38        |
| Multilayer 2M-WS <sub>2</sub>         | CV           | 10 <sup>-8</sup>         | N/A                    | S1        |
|                                       | BCB          | 10 <sup>-8</sup>         | N/A                    |           |
|                                       | MB           | 10 <sup>-8</sup>         | N/A                    |           |
|                                       | MG           | 10 <sup>-7</sup>         | N/A                    |           |
|                                       | PhB          | 10 <sup>-6</sup>         | N/A                    |           |
| 1T'-MoTe <sub>2</sub> films           | MB           | 10 <sup>-8</sup>         | 1.1 × 10 <sup>8</sup>  | 39        |
| 1T-MoS <sub>2</sub>                   | R6G          | 10 <sup>-9</sup>         | 2.92 × 10 <sup>4</sup> | 40        |
|                                       | CV           | 10 <sup>-8</sup>         | 2.87 × 10 <sup>4</sup> |           |
| 1T'-MoTe <sub>2</sub>                 | β-sitosterol | 10 <sup>-9</sup>         | 10 <sup>4</sup>        | 41        |
| 1T'-MoTe <sub>2</sub> films           | R6G          | 10 <sup>-9</sup>         | 1.9 × 10 <sup>6</sup>  | 42        |
| NbTe <sub>2</sub>                     | R6G          | 10 <sup>-9</sup>         | 5.59 × 10 <sup>6</sup> | 43        |
| TaSe <sub>2</sub> films               | R6G          | 10 <sup>-10</sup>        | N/A                    | S2        |
|                                       | Blirubin     | 0.316 × 10 <sup>-6</sup> | N/A                    |           |
| δ-MoN films                           | R6G          | 10 <sup>-10</sup>        | 1.5 × 10 <sup>7</sup>  | 44        |
|                                       | MB           | 10 <sup>-9</sup>         | N/A                    |           |
| 4L PtTe <sub>2</sub>                  | R6G          | 10 <sup>-10</sup>        | N/A                    | S3        |
|                                       | CV           | 10 <sup>-10</sup>        | N/A                    |           |
|                                       | RhB          | 10 <sup>-10</sup>        | N/A                    |           |
| VO <sub>2</sub>                       | R6G          | 10 <sup>-10</sup>        | 6.7 × 10 <sup>7</sup>  | 45        |
| Cu <sub>2</sub> Se nanoflake          | MB           | 10 <sup>-10</sup>        | 4.6 × 10 <sup>8</sup>  | This work |
|                                       | CV           | 10 <sup>-10</sup>        | N/A                    |           |

## Reference

- S1. Y. Guan, M. Chen, Y. Ding, Y. Fang, F. Huang, C.-Y. Xu, L. Zhen, Y. Li, L. Yang and P. Xu, *ACS Nano*, 2024, **18**, 17339-17348.
- S2. Y. Ge, F. Wang, Y. Yang, Y. Xu, Y. Ye, Y. Cai, Q. Zhang, S. Cai, D. F. Jiang, X. Liu, B. Liedberg, J. Mao and Y. Wang, *Small*, 2022, **18**, 2107027.
- S3. Z. Lei, D. Wu, X. Cao, X. Zhang, L. Tao, Z. Zheng, X. Feng, L. Tao and Y. Zhao, *J. Alloys Compd.*, 2023, **937**, 168294.
